# Supplementary material for: The Immunological Epigenetic Landscape of the Human Life Trajectory
Source: MDPI journal article supplement (doi:10.3390/biomedicines10112894), 2022-11-11
Supplement: s1 [file s1]

| Gene Name               | Forward primer            | Reverse primer                | Probe*                             |
|-------------------------|---------------------------|-------------------------------|------------------------------------|
| <i>HLA-DQA1*01</i>      | GAAGGAGACTGCCTGGCG        | CATGATGTTCAAGTTGTGTTTTGC      | CCTGCGGGTCAAAACCTCCAAATTTG         |
| <i>HRM: HLA-DQA1*01</i> | TATGAGGTTAGGAGTTTAAGATTAG | AAAATCCCCTATAATAACATCTCAATTAC |                                    |
| <i>HLA-DQB1*06</i>      | CTTCGTCTCAGTTATGTCTTGGAAG | GAGTCTCTGCCCTCAGCCTGTA        | CTTCGGGTAGCAACTGTCACCTTGATGCT      |
| <i>TINA</i>             | CCTGAGAGCTGTCTGGATGT      | CACTGTGCTCACAGAGTACC          | AGCCTGGCACTCCCAGGTGGT              |
| <i>PPIA</i>             | Assay id: Hs04194521_s1   | Cat. # 4331182                | Supplier: Thermo Fisher Scientific |
| <i>PARTICLE</i>         | Assay id: Hs03847241_s1   | Cat. # 4426961                | Supplier: Thermo Fisher Scientific |

Table S1: Sequences of primers and probes (5’ – 3’) used in this study. Reporter and quenchers were 5’FAM – 3’TAMRA respectively for probes except for listed assays which were 5’FAM – 3’NFQ - MGB.
